1  
2  
3  
4  
5  
6  
7  
8  
9  
10  
11  
12  
13  
14  
15  
16  
17  
18  
19  
20  
21  
22  
23  
24  
25

**A negative role for the interleukin-2-inducible T-cell kinase (ITK) in human Foxp3+ T<sub>REG</sub> differentiation**

Running Title: ITK negatively regulates human Foxp3+ T<sub>REG</sub> differentiation

Polina Mamontov <sup>#</sup>, Ryan A. Eberwine <sup>#</sup>, Jackie Perrigoue, Anuk Das,

Joshua R. Friedman <sup>\*</sup> & J. Rodrigo Mora <sup>\*</sup>

Janssen Research & Development, Spring House, PA 19477, USA

<sup>#</sup> These authors contributed equally to this work

<sup>\*</sup> Address correspondence to:

Joshua Friedman, M.D., Ph.D. ([jfried12@ITS.JNJ.com](mailto:jfried12@ITS.JNJ.com)) or

J. Rodrigo Mora, M.D., Ph.D. ([j.rodriigo.mora@gmail.com](mailto:j.rodriigo.mora@gmail.com))

Janssen Research & Development

1400 McKean Road, Spring House, PA 19477, USA

26 **ABSTRACT**

27 The Tec kinases ITK (interleukin-2-inducible T-cell kinase) and RLK (resting lymphocyte kinase) are critical  
28 components of the proximal TCR/CD3 signal transduction machinery, and data in mice suggest that ITK  
29 negatively regulates T<sub>REG</sub> differentiation. However, whether Tec kinases modulate T<sub>REG</sub> development  
30 and/or function in human T cells remains unknown. Using a novel self-delivery siRNA platform (sdRNA),  
31 we found that ITK knockdown in primary human naïve peripheral blood CD4 T cells increased Foxp3<sup>+</sup> T<sub>REG</sub>  
32 differentiation under both T<sub>REG</sub> and T effector (Teff) cell priming conditions. ITK knockdown also  
33 enhanced the expression of the co-inhibitory receptor PD-1 on FoxP3<sup>+</sup> T cells. T<sub>REGS</sub> differentiated in  
34 vitro (iT<sub>REG</sub>) after ITK knockdown displayed suppressive capacity against effector CD4<sup>+</sup> T cell  
35 proliferation. ITK knockdown decreased IL-17A production in T cells primed under Th17 conditions and  
36 increased Th1 differentiation. Finally, a dual ITK/RLK Tec kinase inhibitor blocked T<sub>REG</sub> differentiation and  
37 T cell activation in general. Our data suggest that targeting ITK in human T cells may be an effective  
38 approach to boost T<sub>REG</sub> in the context of autoimmune diseases, but non-specific inhibition of other Tec  
39 family kinases may broadly inhibit T cell activation.

40

41

## 42 Introduction

43 Interleukin-2-inducible T-cell kinase (ITK) is a member of the TEC kinase family of non-receptor  
44 tyrosine kinases and mediates T cell signaling downstream of TCR activation [1]. Signaling through ITK  
45 modulates T cell activation, T helper cell differentiation, and thymic selection of developing thymocytes.  
46 ITK has been implicated as a critical node in T cell and NK cell mediated inflammation, leading to interest  
47 in developing therapeutics to modulate ITK function in autoimmune and inflammatory diseases [2, 3].  
48 ITK is thought to drive Th2-mediated disease such as allergic asthma, and ITK<sup>-/-</sup> mice exhibit significantly  
49 improved disease course and reduced bronchoconstriction after antigen re-challenge in ovalbumin  
50 sensitized mice [4, 5]. ITK has also been proposed to regulate the balance between inflammatory CD4+  
51 Th17 cells and CD4+ regulatory T cells (T<sub>REG</sub>) in mice [6]. ITK is an important switch for Th1 and Th2  
52 mediated immunity, and murine ITK deficiency results in reduced differentiation and effector cytokine  
53 production from Th1, Th2, and Th17 polarized CD4+ T cells while bolstering T<sub>REG</sub> development [6-9].  
54 However, since ITK is also involved in thymocyte development [10], studies in knock-out mice may not  
55 distinguish potential developmental defects in the immune system from the effects of ITK inhibition on  
56 the mature immune system. Although ITK also serves a scaffolding function for the docking of signaling  
57 intermediates (such as Vav1) that coordinate actin polymerization toward the TCR-APC interface [11],  
58 studies in kinase-dead ITK mutant mice have shown that ITK kinase activity was required for driving Th1,  
59 Th2, and Th17 differentiation [7, 8].

60 Resting lymphocyte kinase (RLK) is another member of the TEC family of non-receptor tyrosine  
61 kinases closely related to ITK. Less is known about RLK in T cell signaling and differentiation. While both  
62 ITK and RLK are activated by Src kinases downstream of the TCR signaling complex, RLK activation is  
63 independent of PI3K activation [12]. RLK is constitutively bound to the T cell plasma membrane via an N-  
64 terminal palmitoylation site, whereas ITK has a pleckstrin homology domain which requires PI3K-  
65 mediated PIP3 generation for recruitment to the plasma membrane after TCR activation [12-15]. Txk  
66 mRNA (encoding RLK) is also downregulated in T cells following activation [15]. Together this suggests  
67 that ITK and RLK play redundant as well as distinct roles in T cell development and activation. In fact,  
68 whereas ITK<sup>-/-</sup> mice exhibit impaired CD4+ and CD8+ T cell development, RLK deficiency alone does not  
69 affect T cell development. However, mice that are deficient in both ITK and RLK have a marked defect in  
70 T cell activation in response to anti-CD3, but not PMA, stimulation [1].

71 While ITK is required for IL-17a production in human T cell lines [14] and it also regulates Th17  
72 and T<sub>REG</sub> differentiation in mice [6], its role in human T<sub>REG</sub> differentiation is not defined. Here we

73 investigated the roles of ITK in human Foxp3+ T<sub>REG</sub> differentiation and function using self-delivered siRNA  
74 (sdRNA) technology optimized to modulate ITK expression in resting primary human T cells. We found  
75 that ITK is a negative regulator of human T<sub>REG</sub> differentiation under *in vitro* T<sub>REG</sub>, Th17, and Th1 polarizing  
76 conditions, and that ITK reciprocally regulates T<sub>REG</sub> and Th17 differentiation from naïve human CD4+ T  
77 cells. ITK also regulates the expression of the co-inhibitory molecule PD-1 on *in vitro*-differentiated  
78 human FoxP3+ CD4+ T cells. Of note, pharmacologic inhibition of multiple TEC family kinases (ITK and  
79 RLK) blocked the T<sub>REG</sub> bolstering effect of ITK knockdown, suggesting that RLK may be required for T<sub>REG</sub>  
80 differentiation in the absence of ITK. Our data show for the first time that ITK regulates CD4+ T<sub>REG</sub> and  
81 Th17 differentiation in primary human T cells and highlights the need for more specific pharmacologic  
82 targeting of TEC kinases in inflammatory and autoimmune disease.

83

84

## 85 **Results**

### 86 **ITK knockdown in human naïve CD4 T cells promotes Foxp3<sup>+</sup> T<sub>REG</sub> differentiation**

87 To assess the effect of ITK on human T<sub>REG</sub> differentiation, we used a recently developed self-  
88 delivered siRNA technology (sdRNA; Advirna, Cambridge, MA) which circumvents the low efficiency of  
89 conventional gene knockdown methods in resting primary human T cells. ITK sdRNA treatment led to a  
90 50%-80% reduction in ITK gene expression relative to a non-targeting sdRNA control (NTC) in human  
91 peripheral blood naïve CD4<sup>+</sup> T cells (**Figure 1A**). CD4<sup>+</sup> T cells were then differentiated under T<sub>REG</sub>, Th17,  
92 Th1, or non-polarizing conditions (Th0). Knockdown of ITK resulted in a 3-8-fold increase in the  
93 frequency of FoxP3<sup>+</sup> T cells and a 2-5-fold increase in FoxP3 MFI under T<sub>REG</sub>, Th17 and Th1 polarizing  
94 conditions relative to NTC (**Figure 1B, C**). These results suggest an inverse relationship between ITK  
95 gene expression and FoxP3<sup>+</sup> T cell differentiation in human CD4 T cells.

### 96 **ITK knockdown modulates Th17 and Th1 differentiation in human T cells**

97 Deletion of *ITK* in mice leads to increased T<sub>REG</sub> development under both T<sub>REG</sub> and Th17 polarizing  
98 conditions [6]. While ITK is critical for driving Th2 mediated immune responses and effector cytokine  
99 production [9, 16, 17] some studies indicate that ITK is also required for Th1 effector cytokine  
100 production in mouse T cells [7, 9, 17].

101 Th17 cells produce the cytokine IL17A and express the chemokine receptor CCR6. We examined  
102 IL17A secretion and surface expression of CCR6 in human Th17 polarized cells upon ITK knock down and  
103 observed down-regulation of both markers relative to T cells treated with NTC (**Figure 2A, B**). Thus,  
104 analogous to mouse T cells [6], ITK reciprocally regulates the differentiation of T<sub>REG</sub> and Th17 cells in  
105 human primary T cells.

106 Although ITK knockdown led to increased development of FoxP3<sup>+</sup> T cells under Th1 polarizing  
107 conditions, it also led to increased IFN $\gamma$  expression (**Figure 2C**). This is in contrast to what has been  
108 observed in mice expressing a mutant form of ITK whose kinase activity can be selectively inhibited by  
109 small molecule inhibitors, where ITK kinase activity was required for Th1, Th2, and Th17 effector  
110 cytokine production [7], or in ITK<sup>-/-</sup> mice, which exhibit normal Th1 differentiation [5, 6].

### 111 **ITK knockdown increases the proportion of human T<sub>REG</sub> expressing the co-inhibitory receptor PD-1.**

112 While FoxP3 is a requisite marker of bona-fide regulatory T cells, in humans it may not be sufficient to  
113 define functional T<sub>REG</sub> cells. Thus, we further assessed surface expression of the co-inhibitory receptor  
114 PD-1 upon ITK knock down in T<sub>REG</sub> polarized cells. Consistent with a negative role of ITK in functional  
115 human T<sub>REG</sub> differentiation, ITK knockdown led to a significant increase in the proportion of FoxP3+ cells  
116 expressing the co-inhibitory molecule PD-1, suggesting that the increase in Foxp3+ T cells correlates with  
117 functional suppressive capacity (**Figure 3**).

### 118 **ITK knockdown increases the proportion of functionally suppressive human T<sub>REG</sub>**

119 Given that ITK knockdown bolsters T<sub>REG</sub> abundance and increases FoxP3 and PD-1 expression, we  
120 next examined the functionality of T<sub>REGS</sub> differentiated *in vitro* in the presence of ITK sdRNA. *In vitro*  
121 differentiated T<sub>REGS</sub> were co-cultured with CFSE-labeled CD4+ responder cells and anti-CD3 anti-CD28  
122 activation beads, and responder T cell proliferation was measured based on CFSE dilution (**Figure 4A**).  
123 T<sub>REG</sub> differentiated *in vitro* in the presence of both ITK and NTC sdRNA were suppressive against effector  
124 cell proliferation in a T<sub>REG</sub>-dose dependent manner (**Figure 4B**). While T<sub>REGS</sub> differentiated in the  
125 presence of ITK sdRNA appeared to exhibit enhanced suppressive capacity in this assay, ITK knockdown  
126 leads to increased T<sub>REG</sub> abundance (**Figure 1**). Thus, despite observing increased PD-1 expression, our  
127 current data do not allow us to determine whether ITK knockdown enhances T<sub>REG</sub> suppression on a per-  
128 cell basis. Nonetheless, we can conclude that T<sub>REGS</sub> differentiated *in vitro* from naïve human CD4+ T cells  
129 are bona fide regulatory T cells and that ITK knockdown can promote increased differentiation (**Figure 1**)  
130 of functionally suppressive (**Figure 4**) human Foxp3+ T<sub>REGS</sub>.

### 131 **A pharmacological ITK/RLK kinase inhibitor abrogates the effect of ITK knockdown on T<sub>REG</sub>** 132 **differentiation**

133 Studies in ITK deficient mice have fostered significant interest in targeting this kinase in  
134 autoimmune and inflammatory diseases [6, 7, 9, 18]. The novel covalent inhibitor PRN694 targets mainly  
135 ITK and RLK, and it blocks T cell activation, proliferation, and T helper cell differentiation [2, 3].  
136 Furthermore, this compound ameliorated colitis progression in the T cell transfer colitis model by  
137 blunting both Th1 and Th17 responses [2]. However, in contrast to ITK-deficient mice, PRN694-treated  
138 mice exhibit reduced T<sub>REG</sub> numbers, suggesting that RLK may play a distinct role in T<sub>REG</sub> differentiation [2,  
139 6]. In agreement with the findings in mice, PRN694 inhibited human T cell activation and T<sub>REG</sub>  
140 differentiation in a dose-dependent manner, thus abrogating the increase in T<sub>REGS</sub> observed upon ITK  
141 knockdown (**Figure 5**).

142            Since RLK expression is suppressed after T cell activation [15], this Tec kinase is likely to be  
143 involved in early T cell activation events which are required to drive both T helper and T<sub>REG</sub>  
144 differentiation. We attempted to isolate the effect of RLK on T<sub>REG</sub> differentiation using sdRNA  
145 knockdown, but none of the eleven sdRNA constructs we tested alone or in combination reduced Txk  
146 gene expression (data not shown). Thus, while it is possible that RLK and ITK play distinct roles in T<sub>REG</sub>  
147 and T helper differentiation, at this point we cannot determine whether these Tec kinases play  
148 redundant or reciprocal roles in this regard.

149

150

151 **Discussion**

152           The TEC family of tyrosine kinases, including ITK and RLK, are critical for TCR-mediated T cell  
153 activation and T helper cell differentiation, and they are likely to play distinct roles in these processes.  
154 We show here for the first time that ITK is a negative regulator of human Foxp3<sup>+</sup> T<sub>REG</sub> and Th1  
155 development, with a reciprocal effect on Th17 differentiation. Our findings extend recent observations  
156 in ITK deficient mice, which display enhanced T<sub>REG</sub> development *in vivo* and *in vitro* and diminished T  
157 effector development and function [6, 7, 9].

158           In addition, we observed a marked increase in IFN $\gamma$  production by Th1 polarized cells after ITK  
159 knockdown. ITK has a well-established role in Th2 mediated inflammation, but reports are conflicting on  
160 its role in Th1 effector function [5, 7, 9, 19-21]. While some data indicate that ITK positively regulates  
161 Th1 development and effector function in mouse T cells [7, 9, 20, 21], our data suggest that ITK is  
162 dispensable for Th1 effector function in primary human T cells, and that targeting ITK alone is therefore  
163 unlikely to be broadly immunosuppressive.

164           While RLK and ITK might fulfill some redundant roles [4], pharmacologic inhibition of both ITK  
165 and RLK in human naïve T cells globally blocked T cell activation and T<sub>REG</sub> differentiation. This is  
166 consistent with observations in ITK/RLK double knockout mice, which showed markedly impaired TCR-  
167 mediated T cell proliferation [1]. Nonetheless, while ITK knockdown markedly enhanced human T<sub>REG</sub>  
168 differentiation from naïve T cells, ITK knockdown followed by pharmacologic inhibition of ITK and RLK  
169 abrogated this effect, suggesting that, in contrast to ITK, RLK is not involved in T<sub>REG</sub> suppression but is  
170 actually required for T<sub>REG</sub> differentiation in the absence of ITK. ITK and RLK are both activated  
171 downstream of TCR ligation however, in contrast to ITK, RLK activation is independent of the PI3K-AKT  
172 axis [12] which is integral for the repression of FoxP3 protein and gene transcription [22, 23]. RLK also  
173 independently phosphorylates the adapter molecule SLP-76 leading to PLC $\gamma$  activation [24], which  
174 explains its compensatory role in T cell activation and differentiation in the absence of ITK. Therefore,  
175 our data support a model whereby selective inhibition of ITK de-represses FoxP3 via inhibition of PI3K-  
176 AKT signaling while sparing RLK to promote PLC $\gamma$ -mediated T cell activation and differentiation.

177           While we have shown that ITK knockdown enhances the *in vitro* differentiation of human T<sub>REG</sub>  
178 with functional suppressive capacity *in vitro*, we cannot conclude whether ITK knockdown affects T<sub>REG</sub>  
179 suppression on a per cell basis. In fact, even though initial ITK knockdown promotes T<sub>REG</sub> differentiation,  
180 sdRNA content is expected to decrease due to initial T cell proliferation and/or degradation, and



181 therefore our data cannot determine whether ITK is truly dispensable for T<sub>REG</sub> suppressive function. The  
182 latter is a potentially important question, because a previous report showed that T<sub>REG</sub> from ITK-deficient  
183 mice did not protect in a colitis model [8], although another paper showed that *ex vivo*-induced ITK-/-  
184 T<sub>REG</sub> efficiently abrogated inflammation in a similar model [6].

185           The reciprocal effects of ITK on effector T cell and T<sub>REG</sub> differentiation makes this a potentially  
186 attractive target in autoimmune and inflammatory diseases. However, the lack of small molecule  
187 inhibitors selective for ITK, sparing other Tec kinases such as RLK, makes this target technically  
188 challenging for drug development. Our current data in human T cells plus previous data in knockout  
189 mice [1] indicate that targeting both ITK and RLK might lead to excessive immunosuppression,  
190 abrogating the beneficial immunomodulatory effect of increasing T<sub>REG</sub> differentiation that could be  
191 achieved by targeting ITK alone.

192

193

194 **Materials and Methods**

195 Cell culture: Naïve CD4<sup>+</sup> CD45RA<sup>+</sup> CD25<sup>-</sup> peripheral blood T cells were purchased from AllCells  
196 (Alameda, CA). T cells were cultured in RPMI 1640 media with pen/strep and 10% HI-FCS on wells coated  
197 with 1ug/ml of anti-CD3 (OKT3, eBioscience). Th cell polarization conditions were as follows. T<sub>REGS</sub>:  
198 300U/ml of IL-2, 5ng/ml of rhTGFβ, 1ug/ml of anti-CD28. For Th17: IL-23 10ng/ml, TGFβ 0.5ng/ml, IL-1β  
199 10ng/ml, IL-2 20U/ml, anti-IFNγ 10ug/ml, anti-IL4 10ug/ml and anti-CD28 1ug/ml. For Th1: anti-IL4  
200 10ug/ml, anti-CD28 1ug/ml, rh IL-2 20U/ml and rh IL-12 10ng/ml. For Th-null (Th0): 1ug/ml of anti-CD28  
201 was added to the media. Cytokines were from R&D systems (Minneapolis, MN) and antibodies from  
202 eBioscience (San Diego, CA) unless otherwise noted.

203

204 Knock down of ITK gene expression: Self-delivery siRNA (sdRNA) constructs were supplied by Advirna  
205 (Cambridge, MA). Cells were cultured in 1% serum in RPMI 1640 in non-activating conditions with sdRNA  
206 concentrations per manufacturer specifications for 24hrs, serum was added to 10% for an additional  
207 24hrs then cells were transferred to media conditioned for T<sub>REG</sub>, Th17, Th1 or Th0 differentiation. Gene  
208 expression analysis was performed 72hr post-sdRNA addition to assess extent of ITK knockdown. Cells  
209 were analyzed after 4 days in T<sub>REG</sub> or T<sub>EFF</sub> polarizing conditions by flow cytometry for FoxP3<sup>+</sup> regulatory T  
210 cells, CCR6 for Th17 and IFNγ for Th1. Several ITK-targeting sdRNA constructs were assessed in  
211 comparison to a non-targeting control (NTC) for ITK knock-down and FoxP3 upregulation and one  
212 construct (ITK49) was selected based on optimal knockdown efficiency and FoxP3<sup>+</sup> T<sub>REG</sub> induction (data  
213 not shown).

214 In vitro suppression assay: T<sub>REGS</sub> were differentiated as indicated above with ITK or NTC sdRNA for 4 days  
215 then collected and labeled with CellTrace Violet (Life Technologies). CD4<sup>+</sup> peripheral blood responder  
216 cells (AllCells; Alameda, CA) were labeled with CFSE. T<sub>REGS</sub> and responder cells were cultured with anti-  
217 CD3/CD28 activation beads (1:10 bead:responder cell ratio; Miltenyi) at T<sub>REG</sub>:responder cell ratios of 1:8  
218 to 1:1 and were incubated together for 72 hours. After 72 hours, the cells were fixed and flow cytometry  
219 was run on the BD LSR-II to determine proliferation. Proliferation profile and division index analysis with  
220 FlowJo.

221 qRT-PCR analysis: Total RNA was isolated from cultured T cells with the RNeasy 96 kit (Qiagen;  
222 Germantown, MD) and reverse transcribed into cDNA with qScript cDNA mastermix (Quanta  
223 Biosciences; Gaithersburg, MD). Quantitative RT-PCR (qPCR) was performed with Taqman primer-probe  
224 sets and Taqman universal mastermix (Applied Biosystems). Data were collected on the Vii7 Real-

225 Time PCR system (Applied Biosystems™) and analyzed by the comparative Ct method (2–  
226  $[\Delta][\Delta]Ct$ ) with normalization to the mean Ct of endogenous control genes HPRT1, TBP and IPO8.

227 Flow cytometry: Cells were stained for Foxp3 and other surface markers with the human regulatory t  
228 cell staining kit #1 (eBioscience). Cells were stained with the fixable Live/Dead aqua dye (Life  
229 Technologies) and CD4, CD25, Foxp3 and CCR6 antibodies. Prior to intracellular IFN $\gamma$  staining, cells were  
230 stimulated with PMA/Ionomycin for 5 hours in the presence of Monensin for the last 4 hours of  
231 stimulation. Data were collected on the BD LSR-II and analysis was performed using FlowJo software.

232 Luminex: Cytokines in culture media supernatants were measured with the Luminex platform using the  
233 Milliplex Human Cytokines 38 plex Immunology Assay (Millipore-Sigma; Billerica, Massachusetts).

234 ITK/RLK compound: The dual ITK/RLK small molecule inhibitor was synthesized in-house (JNJ64461449)  
235 based on published data [2, 3]

236 Statistics: Results are expressed as the mean +/- SEM. Statistical differences between 2 groups were  
237 calculated by unpaired student's t test and among more than two groups by ANOVA. Graphs were  
238 generated with Prism-GraphPad software.

239

240 **References**

- 241 1. Schaeffer, E.M., J. Debnath, G. Yap, D. McVicar, X.C. Liao, D.R. Littman, A. Sher, H.E. Varmus, M.J.  
242 Lenardo, and P.L. Schwartzberg, *Requirement for Tec kinases Rlk and Itk in T cell receptor*  
243 *signaling and immunity*. Science, 1999. **284**(5414): p. 638-41.
- 244 2. Cho, H.S., H.M. Shin, H. Habershtock-Debic, Y. Xing, T.D. Owens, J.O. Funk, R.J. Hill, J.M.  
245 Bradshaw, and L.J. Berg, *A Small Molecule Inhibitor of ITK and RLK Impairs Th1 Differentiation*  
246 *and Prevents Colitis Disease Progression*. J Immunol, 2015. **195**(10): p. 4822-31.
- 247 3. Zhong, Y., S. Dong, E. Strattan, L. Ren, J.P. Butchar, K. Thornton, A. Mishra, P. Porcu, J.M.  
248 Bradshaw, A. Bisconte, T.D. Owens, E. Verner, K.A. Brameld, J.O. Funk, R.J. Hill, A.J. Johnson, and  
249 J.A. Dubovsky, *Targeting interleukin-2-inducible T-cell kinase (ITK) and resting lymphocyte kinase*  
250 *(RLK) using a novel covalent inhibitor PRN694*. J Biol Chem, 2015. **290**(10): p. 5960-78.
- 251 4. Sahu, N., A.M. Venegas, D. Jankovic, W. Mitzner, J. Gomez-Rodriguez, J.L. Cannons, C. Sommers,  
252 P. Love, A. Sher, P.L. Schwartzberg, and A. August, *Selective expression rather than specific*  
253 *function of Txk and Itk regulate Th1 and Th2 responses*. J Immunol, 2008. **181**(9): p. 6125-31.
- 254 5. Sun, Y., I. Peng, J.D. Webster, E. Suto, J. Lesch, X. Wu, K. Senger, G. Francis, K. Barrett, J.L. Collier,  
255 J.D. Burch, M. Zhou, Y. Chen, C. Chan, J. Eastham-Anderson, H. Ngu, O. Li, T. Staton, C. Havnar, A.  
256 Jaochico, J. Jackman, S. Jeet, L. Riol-Blanco, L.C. Wu, D.F. Choy, J.R. Arron, B.S. McKenzie, N.  
257 Ghilardi, M.H. Ismaili, Z. Pei, J. DeVoss, C.D. Austin, W.P. Lee, and A.A. Zarrin, *Inhibition of the*  
258 *kinase ITK in a mouse model of asthma reduces cell death and fails to inhibit the inflammatory*  
259 *response*. Sci Signal, 2015. **8**(405): p. ra122.
- 260 6. Gomez-Rodriguez, J., E.A. Wohlfert, R. Handon, F. Meylan, J.Z. Wu, S.M. Anderson, M.R. Kirby, Y.  
261 Belkaid, and P.L. Schwartzberg, *Itk-mediated integration of T cell receptor and cytokine signaling*  
262 *regulates the balance between Th17 and regulatory T cells*. J Exp Med, 2014. **211**(3): p. 529-43.
- 263 7. Kannan, A., Y. Lee, Q. Qi, W. Huang, A.R. Jeong, S. Ohnigian, and A. August, *Allele-sensitive*  
264 *mutant, Itkas, reveals that Itk kinase activity is required for Th1, Th2, Th17, and iNKT-cell*  
265 *cytokine production*. Eur J Immunol, 2015. **45**(8): p. 2276-85.
- 266 8. Huang, W., A.R. Jeong, A.K. Kannan, L. Huang, and A. August, *IL-2-inducible T cell kinase tunes T*  
267 *regulatory cell development and is required for suppressive function*. J Immunol, 2014. **193**(5): p.  
268 2267-72.
- 269 9. Deakin, A., G. Duddy, S. Wilson, S. Harrison, J. Latcham, M. Fulleylove, S. Fung, J. Smith, M.  
270 Pedrick, T. McKeivitt, L. Felton, J. Morley, D. Quint, D. Fattah, B. Hayes, J. Gough, and R. Solari,  
271 *Characterisation of a K390R ITK kinase dead transgenic mouse--implications for ITK as a*  
272 *therapeutic target*. PLoS One, 2014. **9**(9): p. e107490.
- 273 10. Berg, L.J., L.D. Finkelstein, J.A. Lucas, and P.L. Schwartzberg, *Tec family kinases in T lymphocyte*  
274 *development and function*. Annu Rev Immunol, 2005. **23**: p. 549-600.
- 275 11. Labno, C.M., C.M. Lewis, D. You, D.W. Leung, A. Takesono, N. Kamberos, A. Seth, L.D.  
276 Finkelstein, M.K. Rosen, P.L. Schwartzberg, and J.K. Burkhardt, *Itk functions to control actin*  
277 *polymerization at the immune synapse through localized activation of Cdc42 and WASP*. Curr  
278 Biol, 2003. **13**(18): p. 1619-24.
- 279 12. Debnath, J., M. Chamorro, M.J. Czar, E.M. Schaeffer, M.J. Lenardo, H.E. Varmus, and P.L.  
280 Schwartzberg, *rlk/TXK encodes two forms of a novel cysteine string tyrosine kinase activated by*  
281 *Src family kinases*. Mol Cell Biol, 1999. **19**(2): p. 1498-507.
- 282 13. Czar, M.J., J. Debnath, E.M. Schaeffer, C.M. Lewis, and P.L. Schwartzberg, *Biochemical and*  
283 *genetic analyses of the Tec kinases Itk and Rlk/Txk*. Biochem Soc Trans, 2001. **29**(Pt 6): p. 863-7.
- 284 14. Wang, X., S.E. Boyken, J. Hu, X. Xu, R.P. Rimer, M.A. Shea, A.S. Shaw, A.H. Andreotti, and Y.H.  
285 Huang, *Calmodulin and PI(3,4,5)P(3) cooperatively bind to the Itk pleckstrin homology domain to*  
286 *promote efficient calcium signaling and IL-17A production*. Sci Signal, 2014. **7**(337): p. ra74.

- 287 15. Sommers, C.L., K. Huang, E.W. Shores, A. Grinberg, D.A. Charlick, C.A. Kozak, and P.E. Love,  
288 *Murine txk: a protein tyrosine kinase gene regulated by T cell activation*. *Oncogene*, 1995. **11**(2):  
289 p. 245-51.
- 290 16. Fowell, D.J., K. Shinkai, X.C. Liao, A.M. Beebe, R.L. Coffman, D.R. Littman, and R.M. Locksley,  
291 *Impaired NFATc translocation and failure of Th2 development in Itk-deficient CD4+ T cells*.  
292 *Immunity*, 1999. **11**(4): p. 399-409.
- 293 17. Schaeffer, E.M., G.S. Yap, C.M. Lewis, M.J. Czar, D.W. McVicar, A.W. Cheever, A. Sher, and P.L.  
294 Schwartzberg, *Mutation of Tec family kinases alters T helper cell differentiation*. *Nat Immunol*,  
295 2001. **2**(12): p. 1183-8.
- 296 18. Ferrara, T.J., C. Mueller, N. Sahu, A. Ben-Jebria, and A. August, *Reduced airway*  
297 *hyperresponsiveness and tracheal responses during allergic asthma in mice lacking tyrosine*  
298 *kinase inducible T-cell kinase*. *J Allergy Clin Immunol*, 2006. **117**(4): p. 780-6.
- 299 19. Gomez-Rodriguez, J., N. Sahu, R. Handon, T.S. Davidson, S.M. Anderson, M.R. Kirby, A. August,  
300 and P.L. Schwartzberg, *Differential expression of interleukin-17A and -17F is coupled to T cell*  
301 *receptor signaling via inducible T cell kinase*. *Immunity*, 2009. **31**(4): p. 587-97.
- 302 20. Kannan, A.K., D.G. Kim, A. August, and M.S. Bynoe, *Itk signals promote neuroinflammation by*  
303 *regulating CD4+ T-cell activation and trafficking*. *J Neurosci*, 2015. **35**(1): p. 221-33.
- 304 21. Kannan, A.K., N. Sahu, S. Mohanan, S. Mohinta, and A. August, *IL-2-inducible T-cell kinase*  
305 *modulates TH2-mediated allergic airway inflammation by suppressing IFN-gamma in naive CD4+*  
306 *T cells*. *J Allergy Clin Immunol*, 2013. **132**(4): p. 811-20 e1-5.
- 307 22. Merckenschlager, M. and H. von Boehmer, *PI3 kinase signalling blocks Foxp3 expression by*  
308 *sequestering Foxo factors*. *J Exp Med*, 2010. **207**(7): p. 1347-50.
- 309 23. Dang, E.V., J. Barbi, H.Y. Yang, D. Jinasena, H. Yu, Y. Zheng, Z. Bordman, J. Fu, Y. Kim, H.R. Yen, W.  
310 Luo, K. Zeller, L. Shimoda, S.L. Topalian, G.L. Semenza, C.V. Dang, D.M. Pardoll, and F. Pan,  
311 *Control of T(H)17/T(reg) balance by hypoxia-inducible factor 1*. *Cell*, 2011. **146**(5): p. 772-84.
- 312 24. Schneider, H., B. Guerette, C. Guntermann, and C.E. Rudd, *Resting lymphocyte kinase (Rlk/Txk)*  
313 *targets lymphoid adaptor SLP-76 in the cooperative activation of interleukin-2 transcription in T-*  
314 *cells*. *J Biol Chem*, 2000. **275**(6): p. 3835-40.

315

316

317

318 **Figure Legends**

319

320 Figure 1

321 **A:** ITK mRNA expression in sdRNA treated cells was normalized by the  $\Delta\Delta C_t$  method to the mean of  
322 endogenous control genes (TBP, IPO8, and HPRT1). ITK expression is shown as fold change relative to  
323 non-targeting sdRNA. N=5 donors;  $P < 0.0001$  (Wilcoxon Rank Test)

324 **B and C:** Human naïve CD4<sup>+</sup> T cells were treated with non-targeting (NTC) or ITK targeting sdRNA and  
325 then activated under Th17 (TGF $\beta$ , IL-2, IL-6, IL-23, IL-1 $\beta$ , anti-IFN $\gamma$ , anti-IL-4), Th1 (IL-2, IL-12) or T<sub>REG</sub> (IL-2,  
326 TGF $\beta$ ) polarizing conditions. Four days later, CD4 T cells were analyzed for Foxp3 expression by flow  
327 cytometry. N=3-5 donors per condition, shown is mean  $\pm$  SEM. \* $p < 0.05$ , \*\* $p < 0.01$ . \*\*\* $p < 0.001$   
328 (ANOVA vs. NTC)

329

330 Figure 2

331 Human naïve CD4 T cells were treated with non-targeting (NTC) or ITK targeting sdRNA and then  
332 activated under Th17 (TGF $\beta$ , IL-2, IL-6, IL-23, IL-1 $\beta$ , anti-IFN $\gamma$ , anti-IL-4) or Th1 (IL-2, IL-12) polarizing  
333 conditions. Four days later, culture supernatants were assessed for IL-17A by Luminex (**A**; N=5) and  
334 CD4<sup>+</sup> T cells were analyzed for CCR6 (**B**; N=3) or INF $\gamma$  (**C**; N=3) by flow cytometry.

335

336 Figure 3

337 Human naïve CD4 T cells were treated with non-targeting (NTC) or ITK targeting sdRNA and then  
338 activated under T<sub>REG</sub> (IL-2, TGF $\beta$ ) polarizing conditions. Four days later the CD4 T cells were analyzed for  
339 Foxp3, and PD-1 expression by flow cytometry. N=7 donors. \*\*\* $p < 0.001$  (Wilcoxon Rank Test)

340

341 Figure 4

342 Human naïve T cells were treated with ITK or NTC sdRNAs and differentiated under T<sub>REG</sub> polarizing  
343 conditions (iT<sub>REG</sub>). *In vitro* suppression assays were set up with iT<sub>REG</sub> labeled with CellTrace Violet (CVT)  
344 and CD4<sup>+</sup>CD25<sup>-</sup> responder T cells labeled with CFSE in the presence of anti-CD3/CD28 activation beads.  
345 FACS analysis was performed after 4 days (**A**, 1:1 cell ratio shown) and the FlowJo proliferation platform  
346 was used to calculate the division index (DI; **B**). DI= the average number of cell divisions of the original  
347 population including undivided cells. N=4 donors.

348

349 Figure 5

350 Human naïve CD4 T cells were treated with non-targeting (NTC) or ITK targeting sdRNA followed by the  
351 ITK/RLK kinase inhibitor PRN694 or DMSO control. Cells were then activated under T<sub>REG</sub> polarizing  
352 conditions (IL-2, TGF $\beta$ ). After four days, the CD4<sup>+</sup> T cells were analyzed for Foxp3 expression by flow  
353 cytometry. N=3 donors.

**Figure 1.** ITK knockdown potentiates Foxp3<sup>+</sup> T<sub>REG</sub> development in human T cells under multiple polarizing conditions

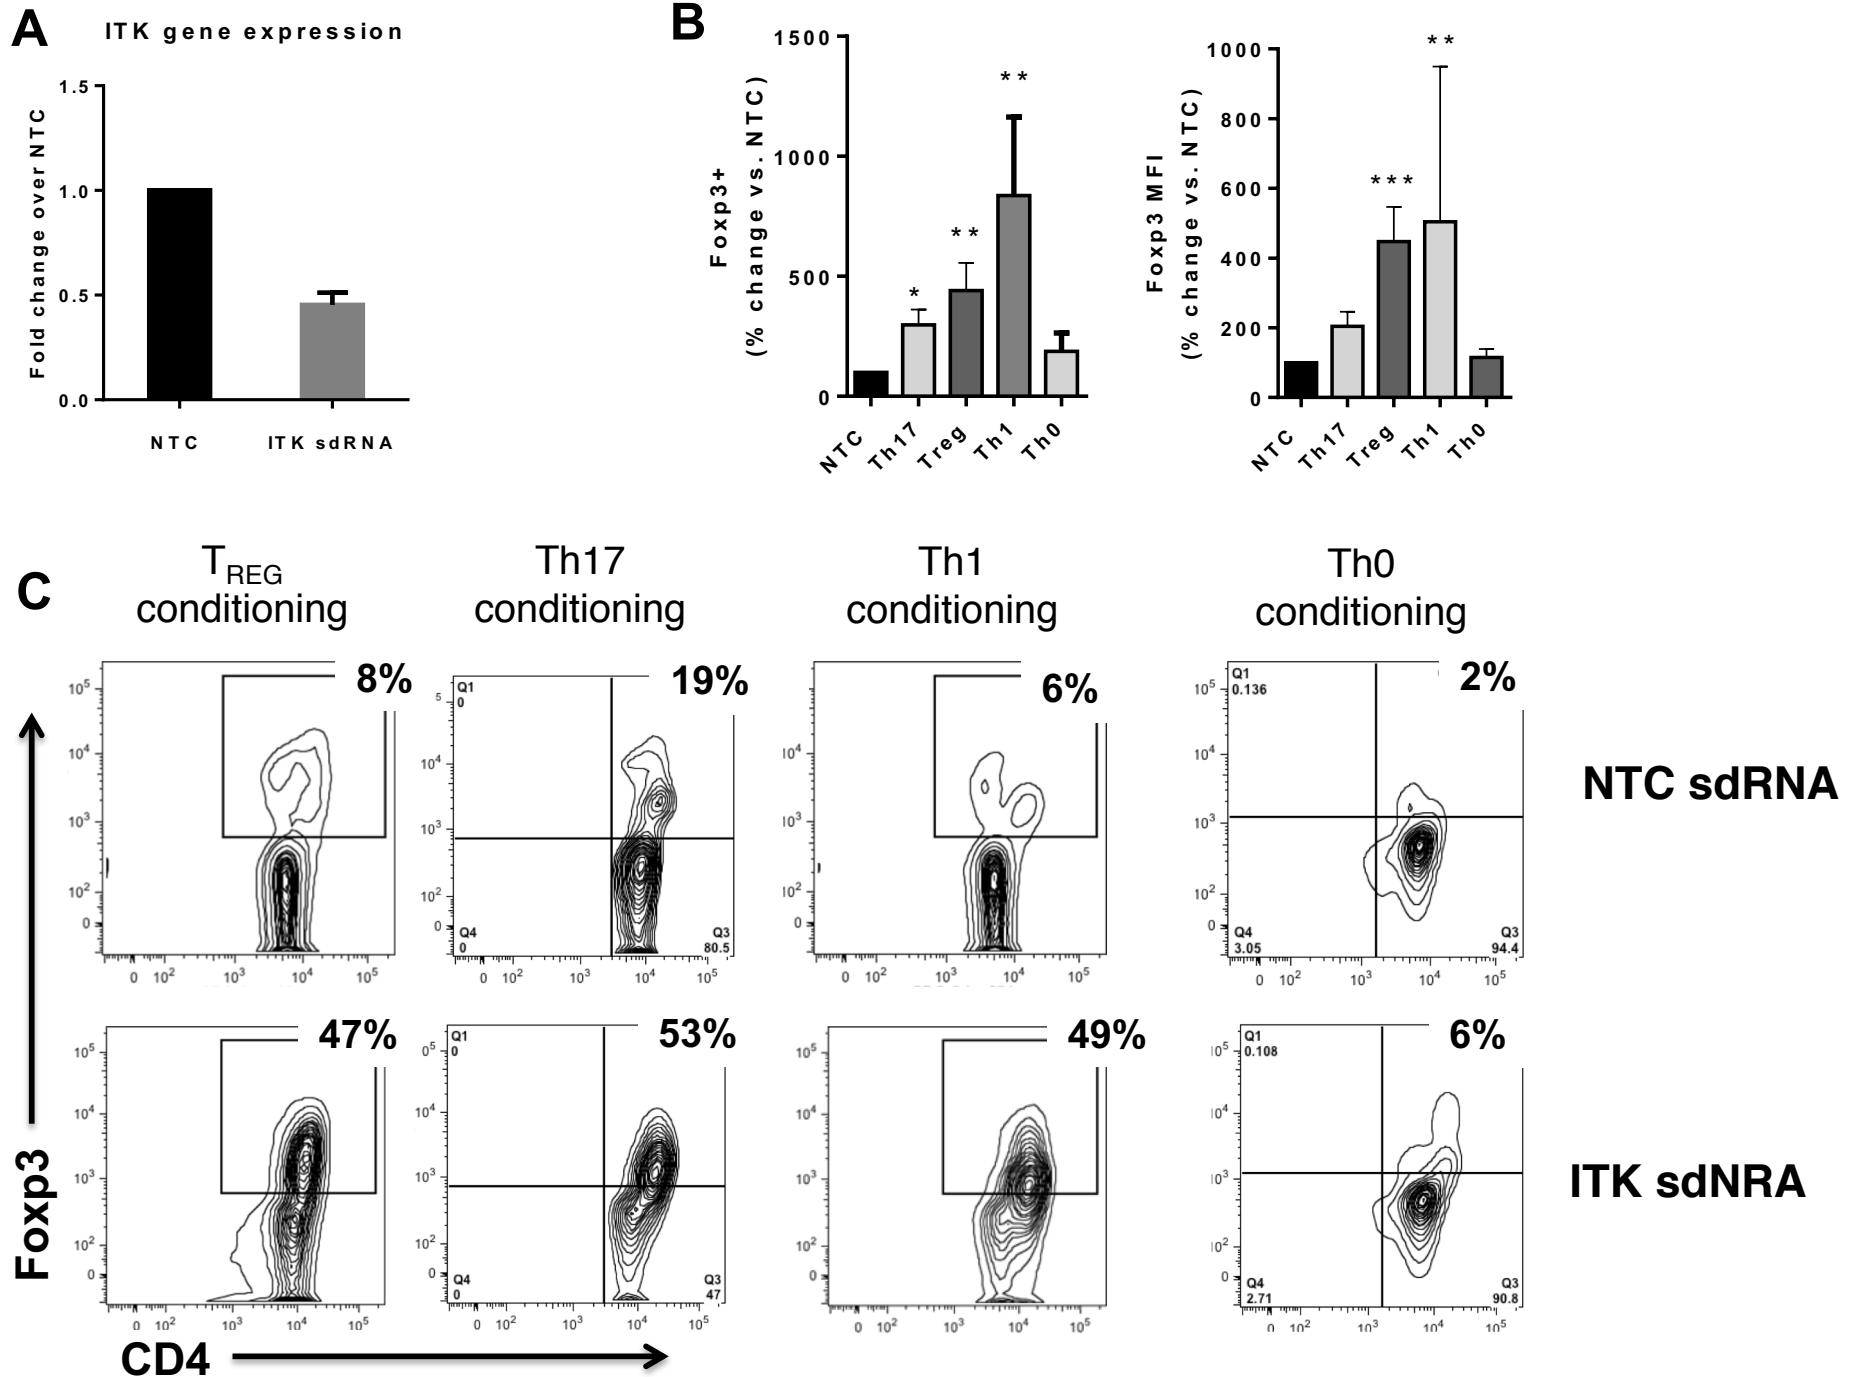

**Figure 2. ITK knockdown alters Th17 and Th1 differentiation**

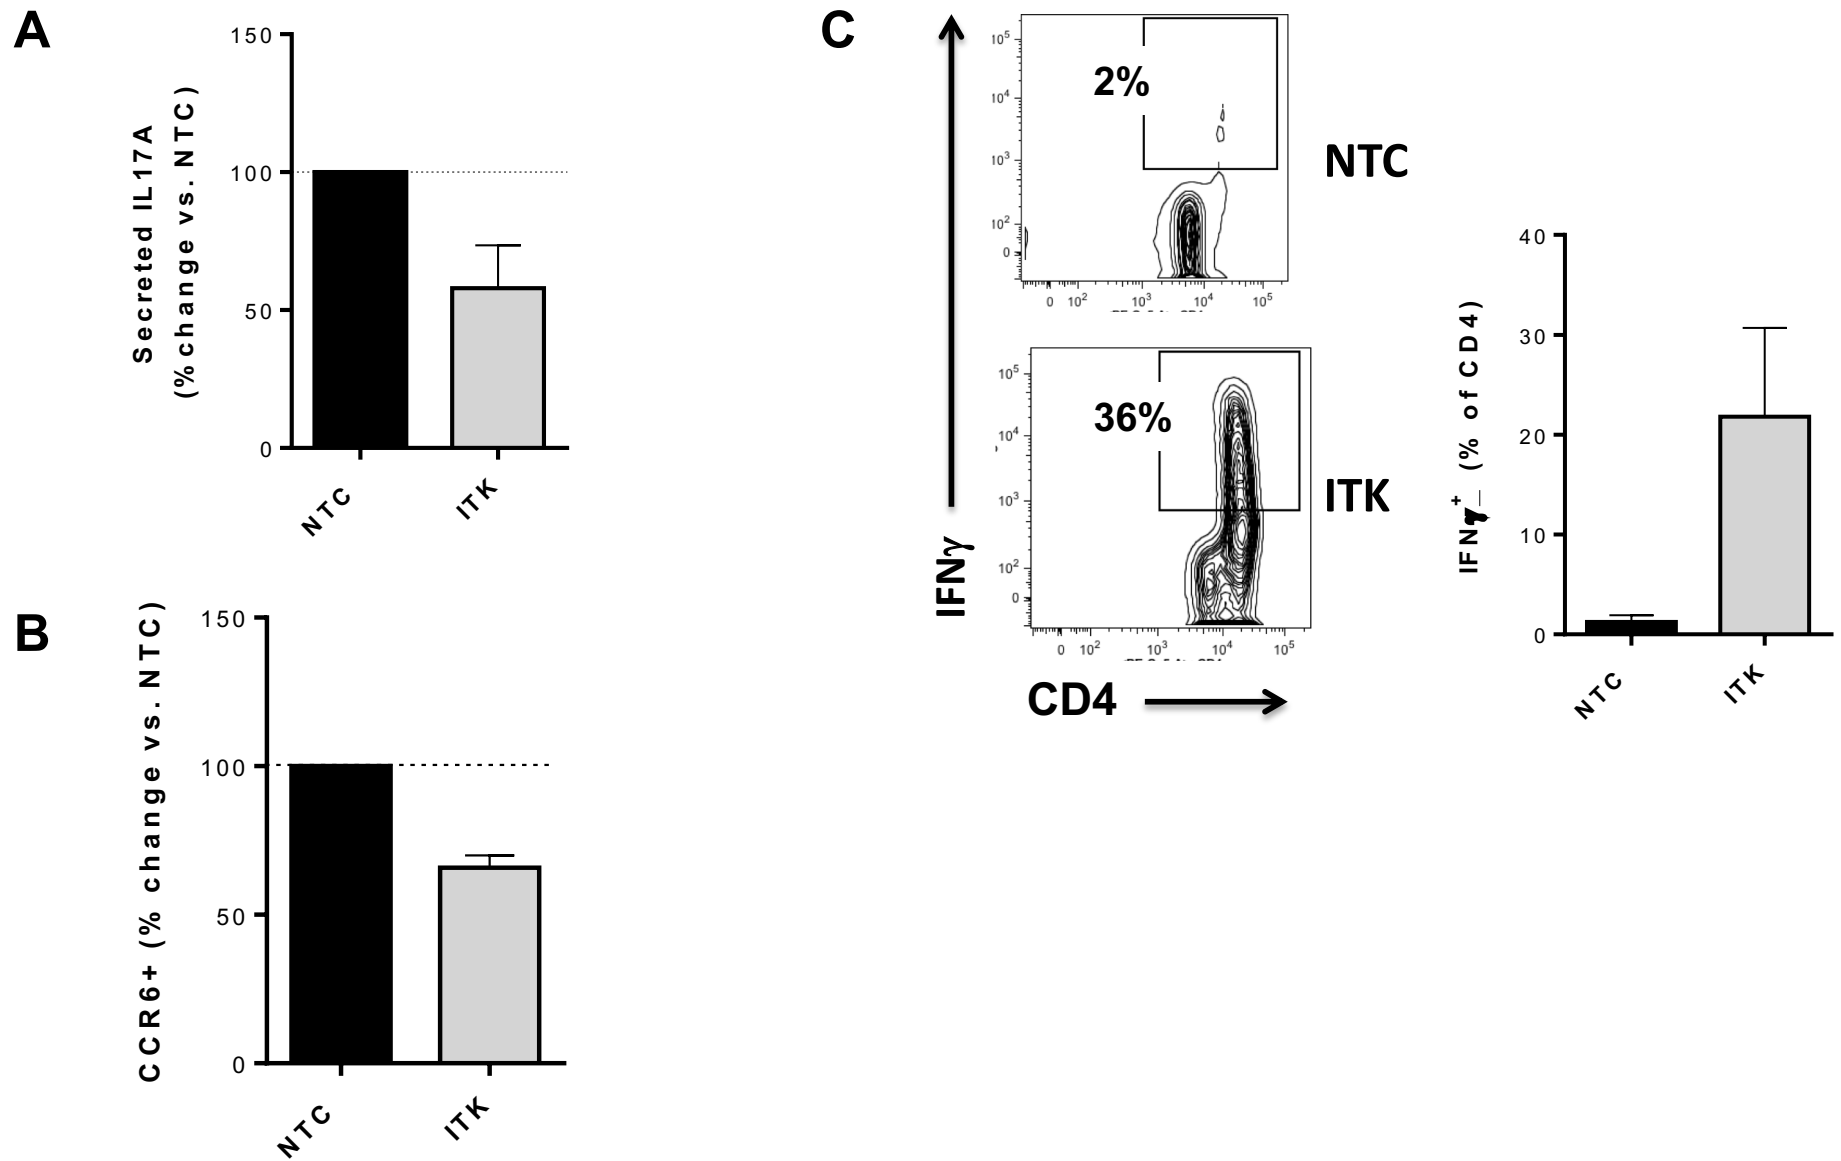



**Figure 3.** ITK knockdown increases the proportion of human T<sub>REG</sub> expressing the co-inhibitory receptor PD-1

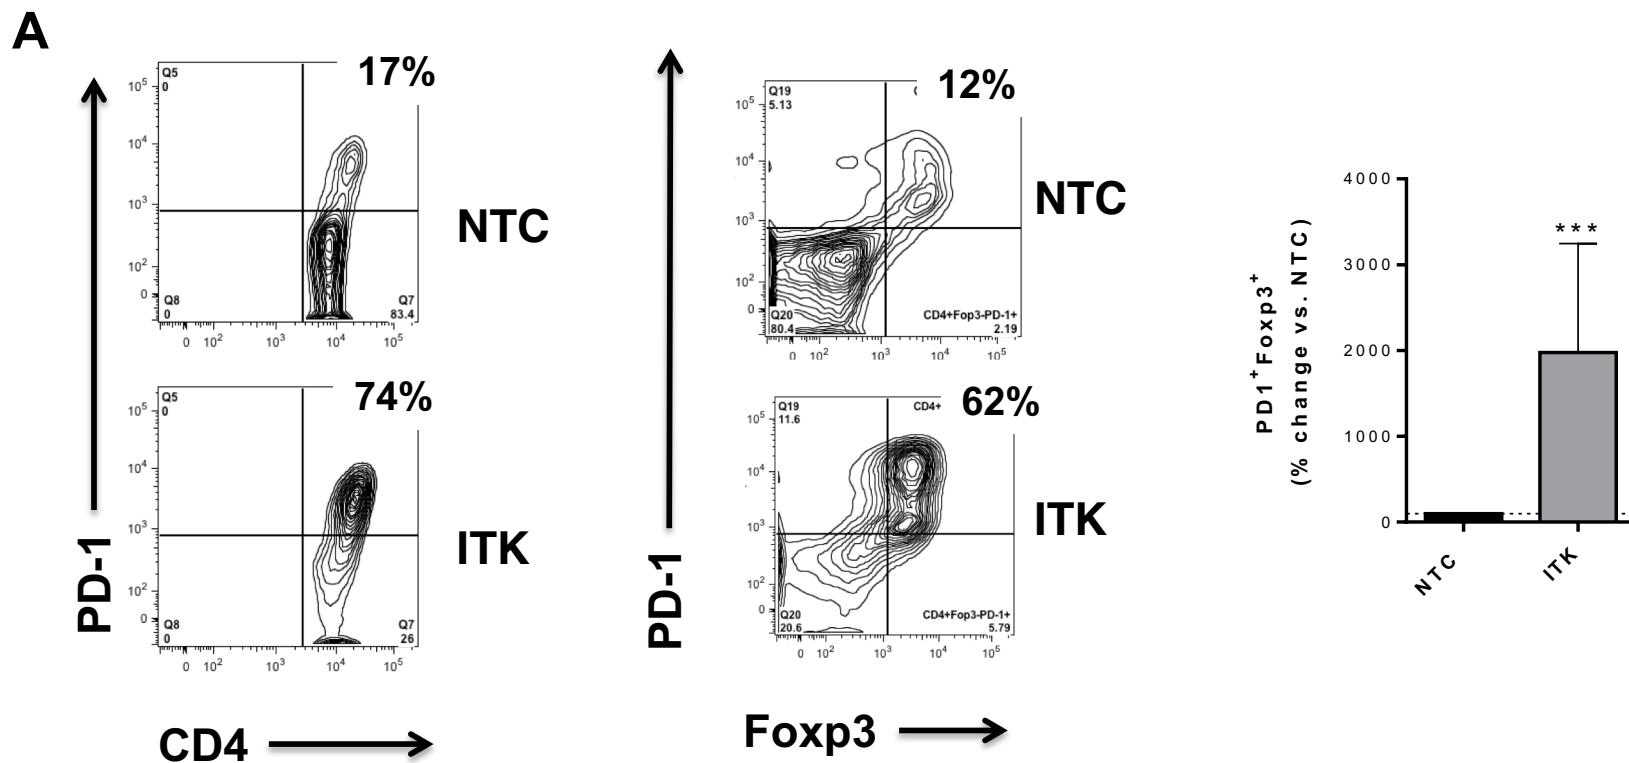

**Figure 4.** ITK knockdown increases the proportion of functionally suppressive human T<sub>REG</sub>

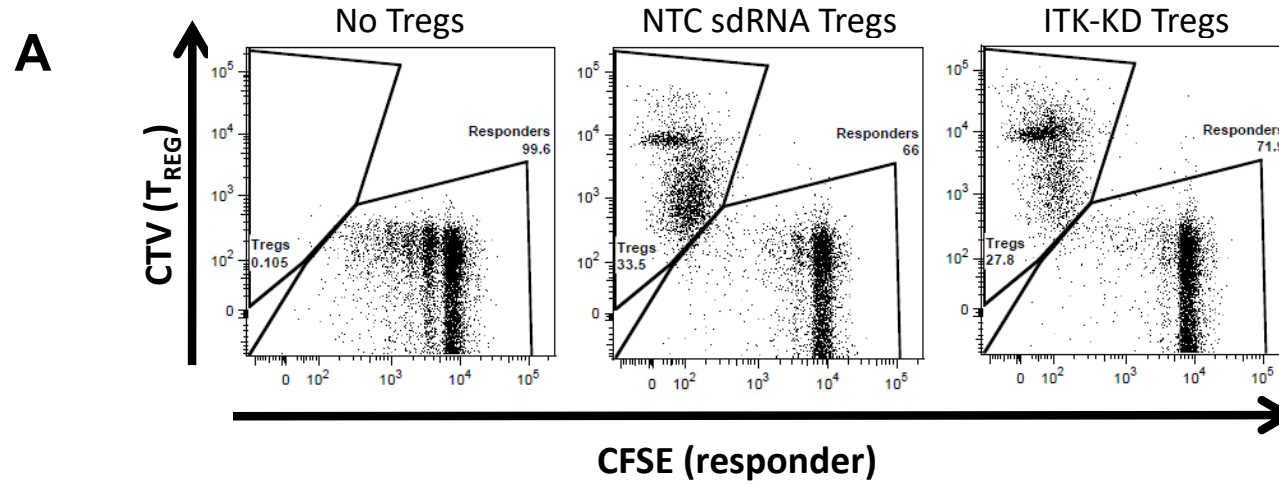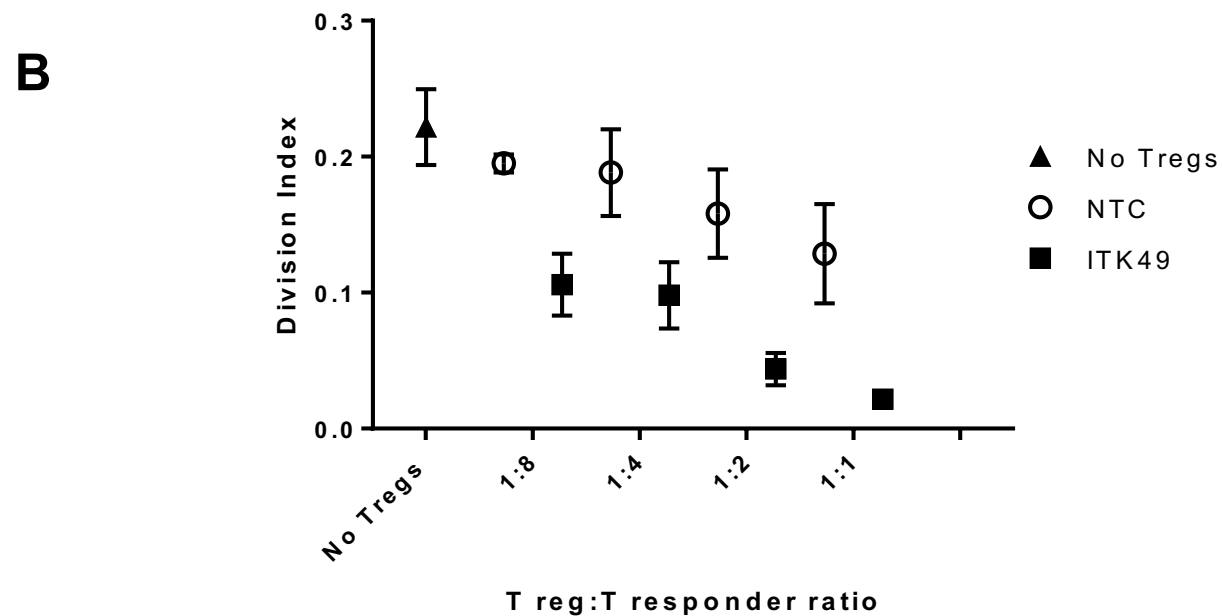

**Figure 5. An ITK/RLK dual kinase inhibitor antagonizes the effect of ITK knockdown on T<sub>REG</sub> differentiation**

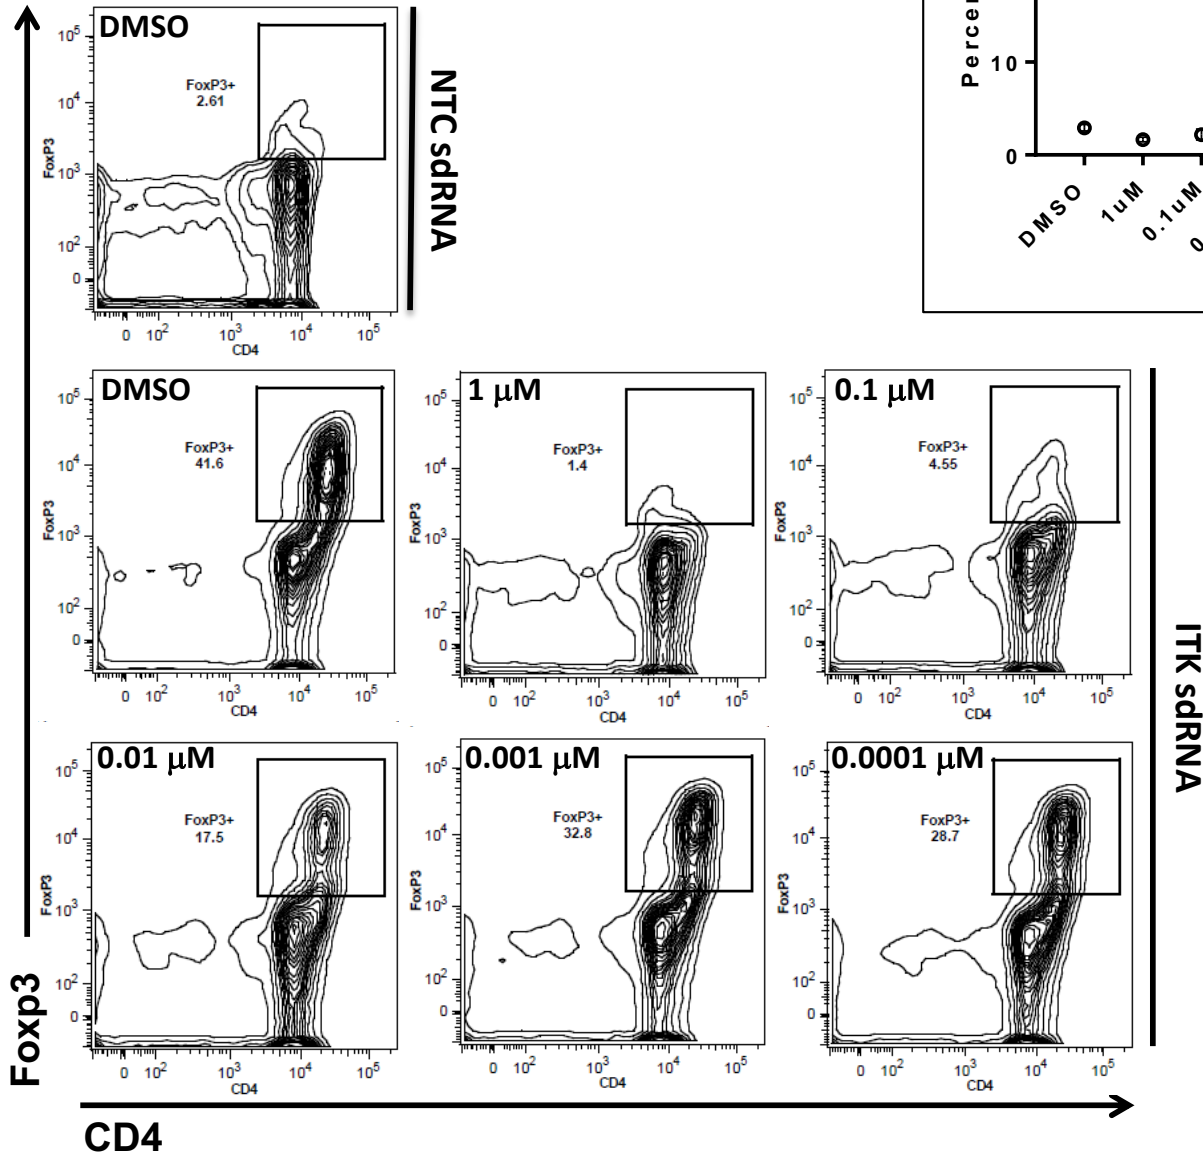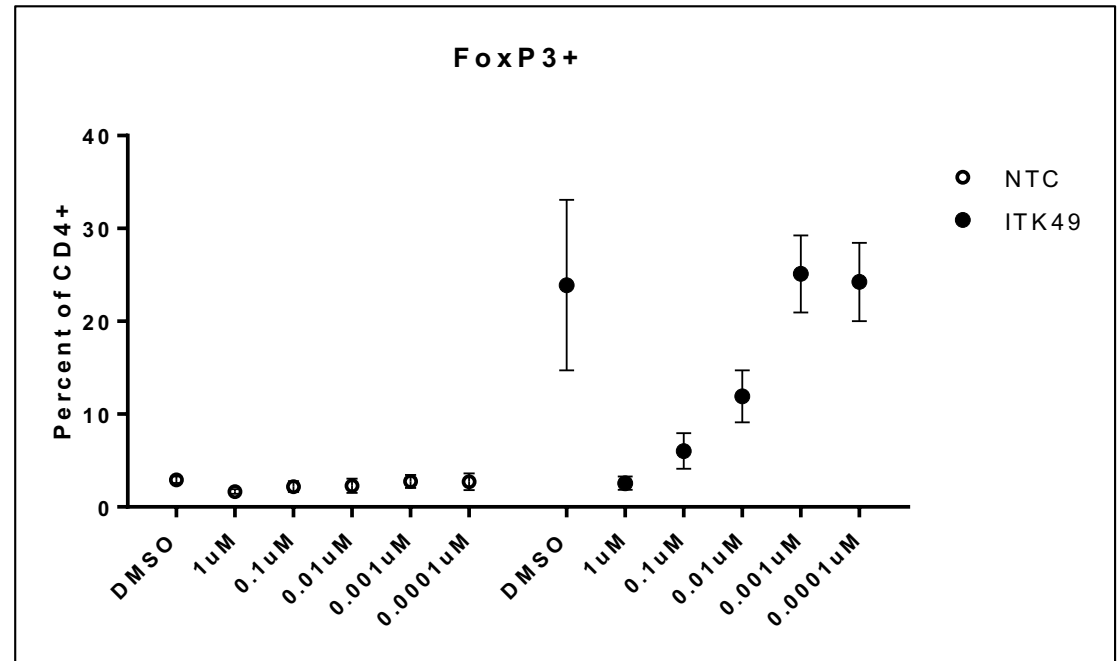

Source: https://www.biorxiv.org/content/10.1101/386508v1.full.pdf
